# Supplementary material
Source: Springer Nature journal article supplement (https://www.springermedizin.de/resource/supplementary/13041_2008_27_MOESM4_ESM.pdf/25657440)
Supplement: MOESM4 [file 25657440]

**A**

Tris brain extracts

|                      |   |   |   |   |   |   |   |   |
|----------------------|---|---|---|---|---|---|---|---|
| <i>Ctsd</i> genotype | + | - | + | - | + | - | + | - |
|----------------------|---|---|---|---|---|---|---|---|

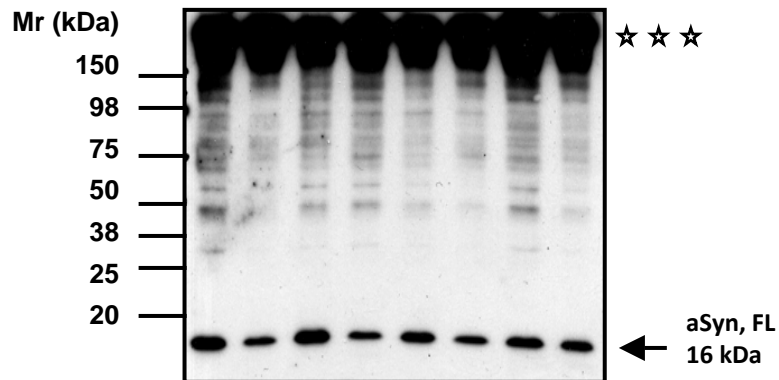No  $\beta$ -ME; WB: Syn-1**B**

Tris brain extracts

|                      |   |   |   |   |   |   |   |   |
|----------------------|---|---|---|---|---|---|---|---|
| <i>Ctsd</i> genotype | + | - | + | - | + | - | + | - |
|----------------------|---|---|---|---|---|---|---|---|

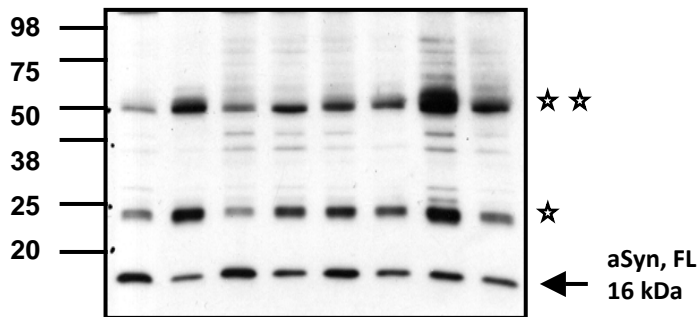With  $\beta$ -ME; WB: Syn-1**C**

Tris brain extracts

|                      |   |   |   |   |   |
|----------------------|---|---|---|---|---|
| <i>Ctsd</i> genotype | - | + | - | + | - |
|----------------------|---|---|---|---|---|

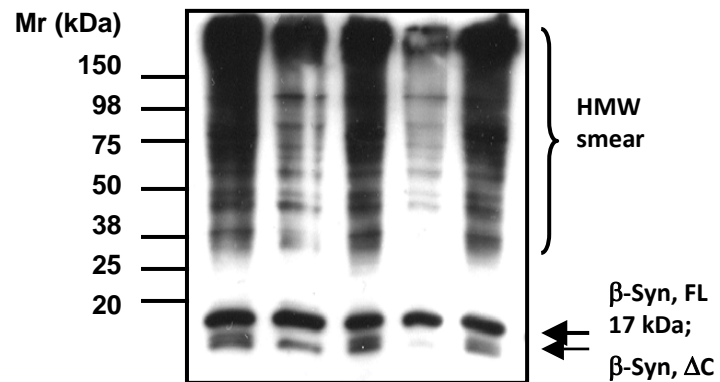With  $\beta$ -ME; WB: anti- $\beta$ -Syn
